# Supplementary material for: Dispersal in the sub-Antarctic: king penguins show remarkably little population genetic differentiation across their range
Source: PubMed Central journal article supplement (PMC5062852; doi:10.1186/s12862-016-0784-z), 2016-10-13

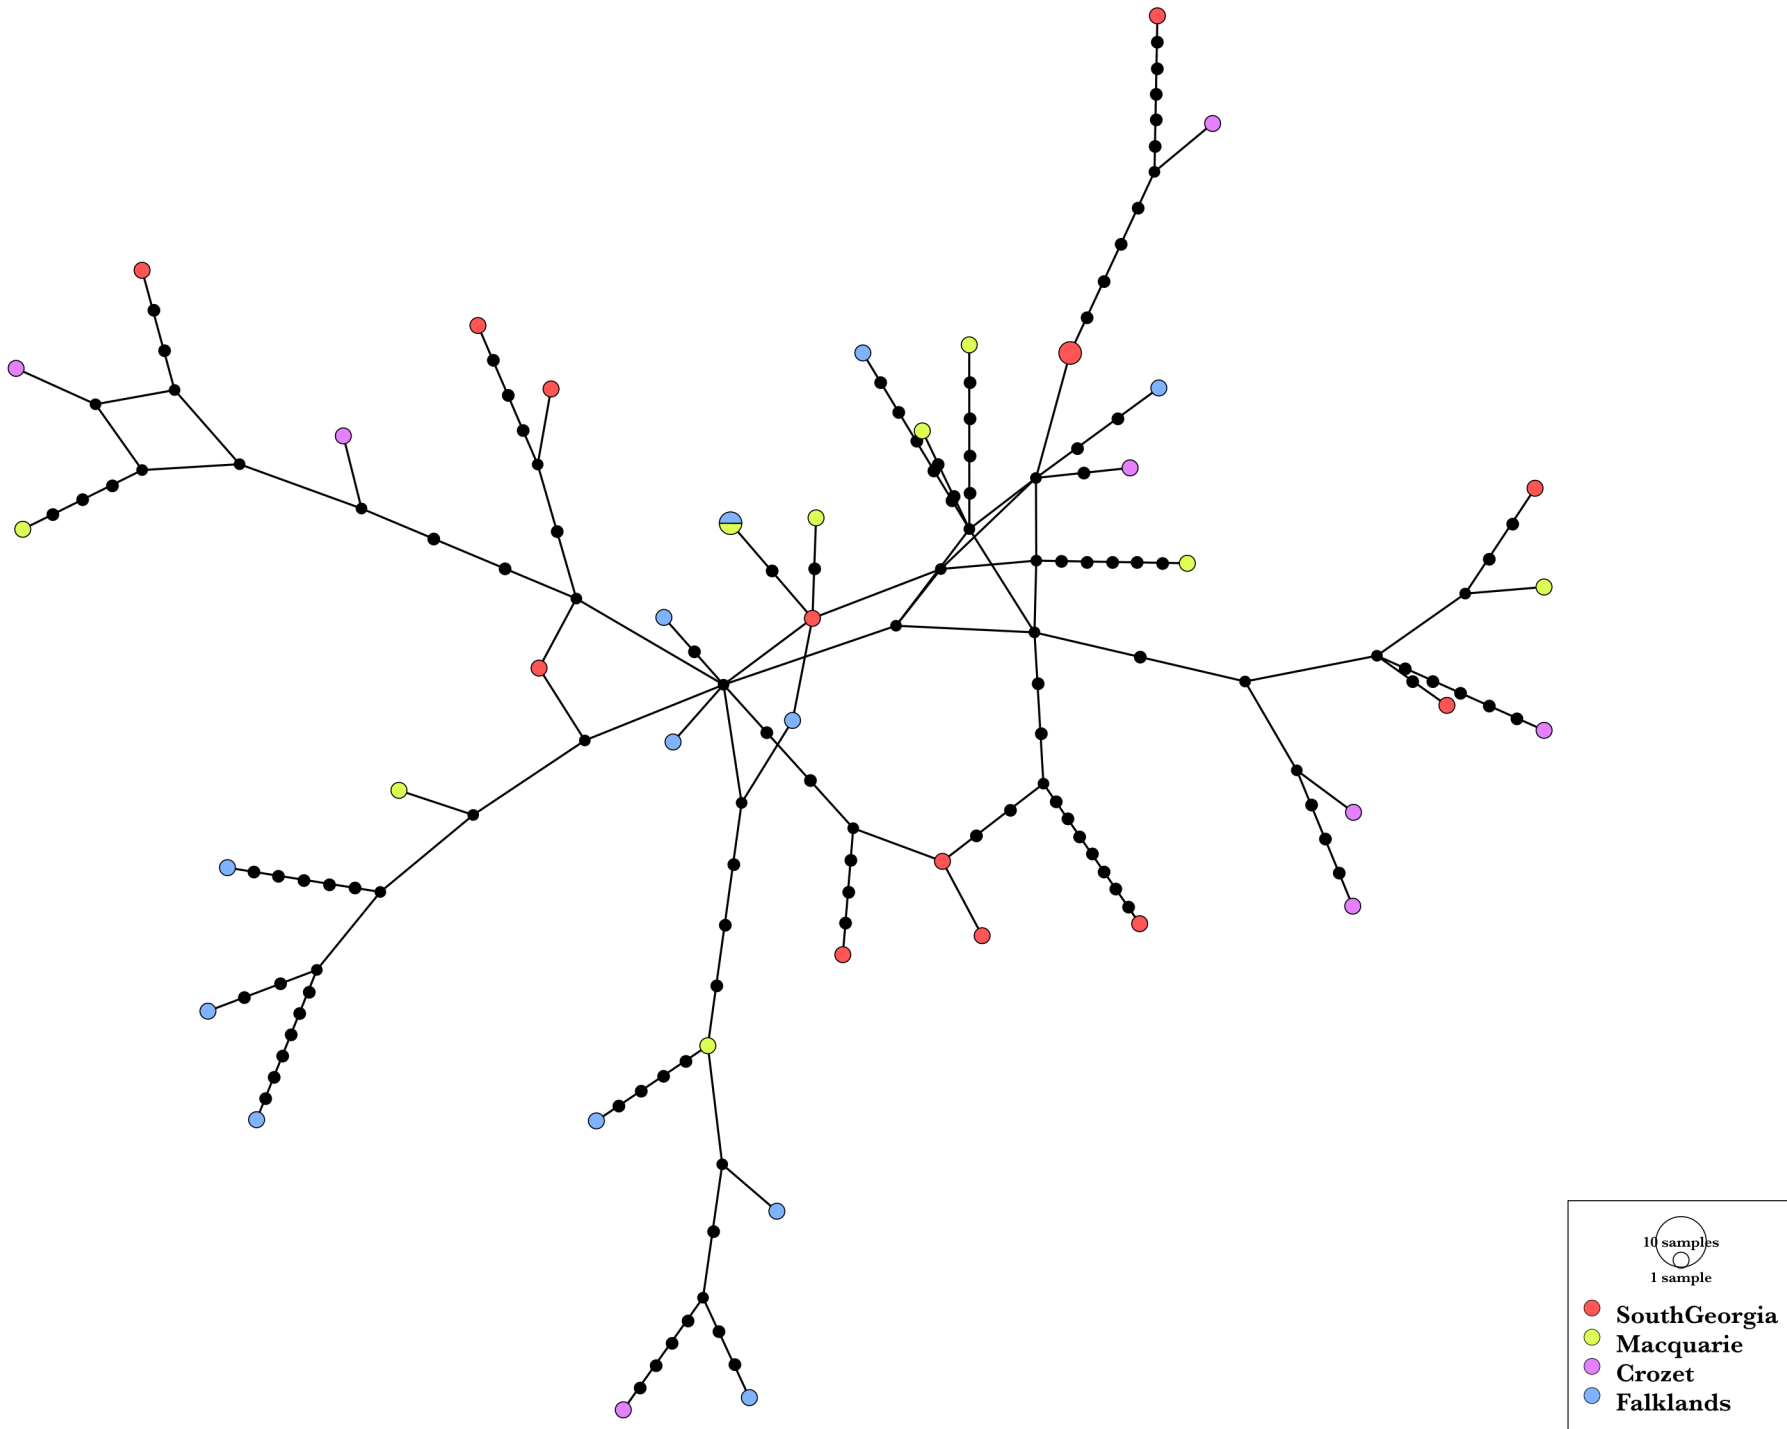

Supplement: 12862_2016_784_MOESM1_ESM.pdf [file 12862_2016_784_MOESM1_ESM.pdf]
